# Supplementary material for: Common and Unique Barriers to the Exchange of Administrative Healthcare Data in Environmental Public Health Tracking Program
Source: MDPI journal article supplement (doi:10.3390/ijerph18084356), 2021-04-20
Supplement: s1 [file s1]

**Table S1.** Feedback from the Pilot Survey.

| Item                                                                                                       | Questions                                                                                                                                                | Feedback (# of Response)                                                                                                                                                                                                                                                                         |
|------------------------------------------------------------------------------------------------------------|----------------------------------------------------------------------------------------------------------------------------------------------------------|--------------------------------------------------------------------------------------------------------------------------------------------------------------------------------------------------------------------------------------------------------------------------------------------------|
| Content                                                                                                    | Are there questions that you feel are missing as we gather this information about your experience acquiring and using hospitalization data for Tracking? | None (3)                                                                                                                                                                                                                                                                                         |
| Logic                                                                                                      | Issues with the survey logic                                                                                                                             | None (3)                                                                                                                                                                                                                                                                                         |
| Clarity                                                                                                    | General edits to survey<br>Any trouble understanding a question—please describe                                                                          | <ul style="list-style-type: none"> <li>Healthcare administrative claims data-&gt; administrative healthcare data (1)</li> <li>Turned off progress bar (1)</li> </ul>                                                                                                                             |
| Structure:                                                                                                 | Have we left out any options (in the multi-choice and check box answers)                                                                                 | <ul style="list-style-type: none"> <li>For some questions, it may be preferable to include an “other” option if possible. Or an “I don’t know.”</li> <li>Maybe add a text box so the respondent can provide a brief explanation (2)</li> <li>There is no way to navigate backward (1)</li> </ul> |
| Response time:                                                                                             | Time to complete the survey—you can include the time spent on information gathering if this is necessary                                                 | <ul style="list-style-type: none"> <li>15–20 min (1)</li> <li>40 min (1)</li> <li>One day (1)</li> </ul>                                                                                                                                                                                         |
| Who from your program was needed to help complete the questions (e.g., PI, PM, hospitalization data lead)? |                                                                                                                                                          | <ul style="list-style-type: none"> <li>No help needed (1)</li> <li>Need help from PI/PM, Hospitalization data lead (2)</li> </ul>                                                                                                                                                                |
